# Supplementary material for: A Comparison of Entropic Diversity and Variance in the Study of Population Structure
Source: MDPI journal article supplement (doi:10.3390/e25030492), 2023-03-13
Supplement: s1 [file s1]

**Eric F. Karlin. A comparison of entropic diversity and variance in the study of population structure**

Supplemental Table S2. This table summarizes range of values and expected behavior of the statistics used in this paper. Most of the range values for each index are taken from [27]. Range values for indices not covered by that source are provided by the author and are listed in **bold** font. Behavior is based the results of this study as well as the author's extensive experience gained from other studies. K = the number of populations.

| Index                   | Range                              | Behavior as $D_T$ or $N'_a$ increases |
|-------------------------|------------------------------------|---------------------------------------|
| SIDTA                   |                                    |                                       |
| $\Omega_{WI}$           | <b>[<math>\approx 0, 1</math>]</b> | decreases                             |
| $\Omega_{AI}$           | <b>[<math>0, \approx 1</math>]</b> | increases                             |
| $\Omega_{AP}$           | <b>[<math>0, 0.5</math>]</b>       | increases                             |
| $D'_{AP}$               | [ $0, 1$ ]                         | increases                             |
| $D_{AP}$                | <b>[<math>1, K</math>]</b>         | Increases                             |
| AMOVA                   |                                    |                                       |
| $F_{WI}$                | <b>[<math>\approx 0, 1</math>]</b> | Increases                             |
| $F_{AI}$                | <b>[<math>&lt; 0, 1</math>]</b>    | Varies, can be highly negative        |
| $F_{STV}$               | [ $< 0, 1$ ]                       | Varies, can be slightly negative      |
| $PH_{PT}$               | [ $< 0, 1$ ]                       | Varies, can be slightly negative      |
| $F'_{STV}$              | [ $< 0, 1$ ]                       | Varies, can be highly negative        |
| Heterozygosity          |                                    |                                       |
| $F_{STh}$               | [ $0, 1$ ]*                        | varies                                |
| Jost's D                | [ $0, 1$ ]                         | varies                                |
| Adjusted Heterozygosity |                                    |                                       |
| $G_{ST}$                | [ $< 0, 1$ ]                       | varies, can be slightly negative      |
| $G'_{STN}$              | [ $< 0, 1$ ]                       | varies, can be slightly negative      |
| $D_{EST}$               | [ $< 0, 1$ ]**                     | varies, can be highly negative        |
| $G''_{ST}$              | [ $< 0, 1$ ]                       | varies, can be highly negative        |
| $G'_{STH}$              | [ $< 0, 1$ ]                       | varies, can be highly negative        |

\* The range of values for  $F_{STh}$  listed in [27] was based on the adjusted version. The range listed here is for the unadjusted version. For one marker, adjusted  $F_{STh} = \text{adjusted } G_{ST}$ .

\*\*The range of values listed for  $D_{EST}$  in [27] was a typo and is here corrected.
