# Supplementary material for: A Comparison of Entropic Diversity and Variance in the Study of Population Structure
Source: MDPI journal article supplement (doi:10.3390/e25030492), 2023-03-13
Supplement: s1 [file s1]

Supplemental Table S1. Theoretical maximum and minimum values for allelic diversity and variance.

Each data set (i.e. pair of populations) has the following properties: ten samples per population; no allelic overlap between each of the two populations, equal AMD ( $\Delta$ ) and equal variance within each population, and with 50% of the total ( $\Delta_T$ ) residing in each population.

Minimum  
one allele for entire data set (1 marker)  
two diploid pops, each with 10 samples

| AMDA                                        |                    |                            |                           |               |          | AMOVA    |       |      |      |           |    |
|---------------------------------------------|--------------------|----------------------------|---------------------------|---------------|----------|----------|-------|------|------|-----------|----|
| Source of Information                       | Degrees of Freedom | Diversity Estimate exp(sH) | [0,1] Scaled Diversity D' | $\Delta$      | $\Omega$ | Source   | df    | SS   | MS   | Est. Var. | %  |
| AP                                          | 1                  | 1.00                       | 0.00                      | 0.0           | 0.00     | AP       | 1     | 0.00 | 0.00 | 0.00      | 0% |
| AI                                          | 18                 | 1.00                       | 0.00                      | 0.0           | 0.00     | AI       | 18    | 0.00 | 0.00 | 0.00      | 0% |
| WI                                          | 20                 | 1.00                       | 0.00                      | 1.0           | 1.00     | WI       | 20    | 0.00 | 0.00 | 0.00      | 0% |
| Total                                       | 39                 | 1.00                       | 0.00                      | 1.0           | 1.00     | Total    | 39    | 0.00 |      | 0.00      | 0% |
|                                             |                    |                            |                           |               |          | Stat     | Value |      |      |           |    |
| one allele for entire data set (10 markers) |                    |                            |                           | $\Omega_{ST}$ | 0.00     | $F_{ST}$ | #N/A  |      |      |           |    |
| two diploid pops, each with 10 samples      |                    |                            |                           | $\Omega_{IS}$ | 0.00     | $F_{IS}$ | #N/A  |      |      |           |    |
|                                             |                    |                            |                           | $\Omega_{IT}$ | 0.00     | $F_{IT}$ | #N/A  |      |      |           |    |
|                                             |                    |                            |                           |               |          |          |       |      |      |           |    |
|                                             |                    |                            |                           |               |          |          |       |      |      |           |    |
|                                             |                    |                            |                           |               |          |          |       |      |      |           |    |
|                                             |                    |                            |                           |               |          |          |       |      |      |           |    |
|                                             |                    |                            |                           |               |          |          |       |      |      |           |    |
|                                             |                    |                            |                           |               |          |          |       |      |      |           |    |
|                                             |                    |                            |                           |               |          |          |       |      |      |           |    |
|                                             |                    |                            |                           |               |          |          |       |      |      |           |    |
|                                             |                    |                            |                           |               |          |          |       |      |      |           |    |
|                                             |                    |                            |                           |               |          |          |       |      |      |           |    |
|                                             |                    |                            |                           |               |          |          |       |      |      |           |    |
|                                             |                    |                            |                           |               |          |          |       |      |      |           |    |
|                                             |                    |                            |                           |               |          |          |       |      |      |           |    |
|                                             |                    |                            |                           |               |          |          |       |      |      |           |    |
|                                             |                    |                            |                           |               |          |          |       |      |      |           |    |
|                                             |                    |                            |                           |               |          |          |       |      |      |           |    |
|                                             |                    |                            |                           |               |          |          |       |      |      |           |    |
|                                             |                    |                            |                           |               |          |          |       |      |      |           |    |
|                                             |                    |                            |                           |               |          |          |       |      |      |           |    |
|                                             |                    |                            |                           |               |          |          |       |      |      |           |    |
|                                             |                    |                            |                           |               |          |          |       |      |      |           |    |
|                                             |                    |                            |                           |               |          |          |       |      |      |           |    |
|                                             |                    |                            |                           |               |          |          |       |      |      |           |    |
|                                             |                    |                            |                           |               |          |          |       |      |      |           |    |
|                                             |                    |                            |                           |               |          |          |       |      |      |           |    |
|                                             |                    |                            |                           |               |          |          |       |      |      |           |    |
|                                             |                    |                            |                           |               |          |          |       |      |      |           |    |
|                                             |                    |                            |                           |               |          |          |       |      |      |           |    |
|                                             |                    |                            |                           |               |          |          |       |      |      |           |    |
|                                             |                    |                            |                           |               |          |          |       |      |      |           |    |
|                                             |                    |                            |                           |               |          |          |       |      |      |           |    |
|                                             |                    |                            |                           |               |          |          |       |      |      |           |    |
|                                             |                    |                            |                           |               |          |          |       |      |      |           |    |
|                                             |                    |                            |                           |               |          |          |       |      |      |           |    |
|                                             |                    |                            |                           |               |          |          |       |      |      |           |    |
|                                             |                    |                            |                           |               |          |          |       |      |      |           |    |
|                                             |                    |                            |                           |               |          |          |       |      |      |           |    |
|                                             |                    |                            |                           |               |          |          |       |      |      |           |    |
|                                             |                    |                            |                           |               |          |          |       |      |      |           |    |
|                                             |                    |                            |                           |               |          |          |       |      |      |           |    |
|                                             |                    |                            |                           |               |          |          |       |      |      |           |    |
|                                             |                    |                            |                           |               |          |          |       |      |      |           |    |
|                                             |                    |                            |                           |               |          |          |       |      |      |           |    |
|                                             |                    |                            |                           |               |          |          |       |      |      |           |    |
|                                             |                    |                            |                           |               |          |          |       |      |      |           |    |
|                                             |                    |                            |                           |               |          |          |       |      |      |           |    |
|                                             |                    |                            |                           |               |          |          |       |      |      |           |    |
|                                             |                    |                            |                           |               |          |          |       |      |      |           |    |
|                                             |                    |                            |                           |               |          |          |       |      |      |           |    |
|                                             |                    |                            |                           |               |          |          |       |      |      |           |    |
|                                             |                    |                            |                           |               |          |          |       |      |      |           |    |
|                                             |                    |                            |                           |               |          |          |       |      |      |           |    |
|                                             |                    |                            |                           |               |          |          |       |      |      |           |    |
|                                             |                    |                            |                           |               |          |          |       |      |      |           |    |
|                                             |                    |                            |                           |               |          |          |       |      |      |           |    |
|                                             |                    |                            |                           |               |          |          |       |      |      |           |    |
|                                             |                    |                            |                           |               |          |          |       |      |      |           |    |
|                                             |                    |                            |                           |               |          |          |       |      |      |           |    |
|                                             |                    |                            |                           |               |          |          |       |      |      |           |    |
|                                             |                    |                            |                           |               |          |          |       |      |      |           |    |
|                                             |                    |                            |                           |               |          |          |       |      |      |           |    |
|                                             |                    |                            |                           |               |          |          |       |      |      |           |    |
|                                             |                    |                            |                           |               |          |          |       |      |      |           |    |
|                                             |                    |                            |                           |               |          |          |       |      |      |           |    |
|                                             |                    |                            |                           |               |          |          |       |      |      |           |    |
|                                             |                    |                            |                           |               |          |          |       |      |      |           |    |
|                                             |                    |                            |                           |               |          |          |       |      |      |           |    |
|                                             |                    |                            |                           |               |          |          |       |      |      |           |    |
|                                             |                    |                            |                           |               |          |          |       |      |      |           |    |
|                                             |                    |                            |                           |               |          |          |       |      |      |           |    |
|                                             |                    |                            |                           |               |          |          |       |      |      |           |    |
|                                             |                    |                            |                           |               |          |          |       |      |      |           |    |
|                                             |                    |                            |                           |               |          |          |       |      |      |           |    |
|                                             |                    |                            |                           |               |          |          |       |      |      |           |    |
|                                             |                    |                            |                           |               |          |          |       |      |      |           |    |
|                                             |                    |                            |                           |               |          |          |       |      |      |           |    |
|                                             |                    |                            |                           |               |          |          |       |      |      |           |    |
|                                             |                    |                            |                           |               |          |          |       |      |      |           |    |
|                                             |                    |                            |                           |               |          |          |       |      |      |           |    |
|                                             |                    |                            |                           |               |          |          |       |      |      |           |    |
|                                             |                    |                            |                           |               |          |          |       |      |      |           |    |
|                                             |                    |                            |                           |               |          |          |       |      |      |           |    |
|                                             |                    |                            |                           |               |          |          |       |      |      |           |    |
|                                             |                    |                            |                           |               |          |          |       |      |      |           |    |
|                                             |                    |                            |                           |               |          |          |       |      |      |           |    |
|                                             |                    |                            |                           |               |          |          |       |      |      |           |    |
|                                             |                    |                            |                           |               |          |          |       |      |      |           |    |
|                                             |                    |                            |                           |               |          |          |       |      |      |           |    |
|                                             |                    |                            |                           |               |          |          |       |      |      |           |    |
|                                             |                    |                            |                           |               |          |          |       |      |      |           |    |
|                                             |                    |                            |                           |               |          |          |       |      |      |           |    |
|                                             |                    |                            |                           |               |          |          |       |      |      |           |    |
|                                             |                    |                            |                           |               |          |          |       |      |      |           |    |
|                                             |                    |                            |                           |               |          |          |       |      |      |           |    |
|                                             |                    |                            |                           |               |          |          |       |      |      |           |    |
|                                             |                    |                            |                           |               |          |          |       |      |      |           |    |
|                                             |                    |                            |                           |               |          |          |       |      |      |           |    |
|                                             |                    |                            |                           |               |          |          |       |      |      |           |    |
|                                             |                    |                            |                           |               |          |          |       |      |      |           |    |
|                                             |                    |                            |                           |               |          |          |       |      |      |           |    |
|                                             |                    |                            |                           |               |          |          |       |      |      |           |    |
|                                             |                    |                            |                           |               |          |          |       |      |      |           |    |
|                                             |                    |                            |                           |               |          |          |       |      |      |           |    |
|                                             |                    |                            |                           |               |          |          |       |      |      |           |    |
|                                             |                    |                            |                           |               |          |          |       |      |      |           |    |
|                                             |                    |                            |                           |               |          |          |       |      |      |           |    |
|                                             |                    |                            |                           |               |          |          |       |      |      |           |    |
|                                             |                    |                            |                           |               |          |          |       |      |      |           |    |
|                                             |                    |                            |                           |               |          |          |       |      |      |           |    |
|                                             |                    |                            |                           |               |          |          |       |      |      |           |    |
|                                             |                    |                            |                           |               |          |          |       |      |      |           |    |
|                                             |                    |                            |                           |               |          |          |       |      |      |           |    |
|                                             |                    |                            |                           |               |          |          |       |      |      |           |    |
|                                             |                    |                            |                           |               |          |          |       |      |      |           |    |
|                                             |                    |                            |                           |               |          |          |       |      |      |           |    |
|                                             |                    |                            |                           |               |          |          |       |      |      |           |    |
|                                             |                    |                            |                           |               |          |          |       |      |      |           |    |
|                                             |                    |                            |                           |               |          |          |       |      |      |           |    |
|                                             |                    |                            |                           |               |          |          |       |      |      |           |    |
|                                             |                    |                            |                           |               |          |          |       |      |      |           |    |
|                                             |                    |                            |                           |               |          |          |       |      |      |           |    |
|                                             |                    |                            |                           |               |          |          |       |      |      |           |    |
|                                             |                    |                            |                           |               |          |          |       |      |      |           |    |
|                                             |                    |                            |                           |               |          |          |       |      |      |           |    |
|                                             |                    |                            |                           |               |          |          |       |      |      |           |    |
|                                             |                    |                            |                           |               |          |          |       |      |      |           |    |
|                                             |                    |                            |                           |               |          |          |       |      |      |           |    |
|                                             |                    |                            |                           |               |          |          |       |      |      |           |    |
|                                             |                    |                            |                           |               |          |          |       |      |      |           |    |
|                                             |                    |                            |                           |               |          |          |       |      |      |           |    |
|                                             |                    |                            |                           |               |          |          |       |      |      |           |    |
|                                             |                    |                            |                           |               |          |          |       |      |      |           |    |
|                                             |                    |                            |                           |               |          |          |       |      |      |           |    |
|                                             |                    |                            |                           |               |          |          |       |      |      |           |    |
|                                             |                    |                            |                           |               |          |          |       |      |      |           |    |
|                                             |                    |                            |                           |               |          |          |       |      |      |           |    |
|                                             |                    |                            |                           |               |          |          |       |      |      |           |    |
|                                             |                    |                            |                           |               |          |          |       |      |      |           |    |
|                                             |                    |                            |                           |               |          |          |       |      |      |           |    |
|                                             |                    |                            |                           |               |          |          |       |      |      |           |    |
|                                             |                    |                            |                           |               |          |          |       |      |      |           |    |
|                                             |                    |                            |                           |               |          |          |       |      |      |           |    |
|                                             |                    |                            |                           |               |          |          |       |      |      |           |    |
|                                             |                    |                            |                           |               |          |          |       |      |      |           |    |
|                                             |                    |                            |                           |               |          |          |       |      |      |           |    |
|                                             |                    |                            |                           |               |          |          |       |      |      |           |    |
|                                             |                    |                            |                           |               |          |          |       |      |      |           |    |
|                                             |                    |                            |                           |               |          |          |       |      |      |           |    |
|                                             |                    |                            |                           |               |          |          |       |      |      |           |    |
|                                             |                    |                            |                           |               |          |          |       |      |      |           |    |
|                                             |                    |                            |                           |               |          |          |       |      |      |           |    |
|                                             |                    |                            |                           |               |          |          |       |      |      |           |    |
|                                             |                    |                            |                           |               |          |          |       |      |      |           |    |
|                                             |                    |                            |                           |               |          |          |       |      |      |           |    |
|                                             |                    |                            |                           |               |          |          |       |      |      |           |    |
|                                             |                    |                            |                           |               |          |          |       |      |      |           |    |
|                                             |                    |                            |                           |               |          |          |       |      |      |           |    |
|                                             |                    |                            |                           |               |          |          |       |      |      |           |    |
|                                             |                    |                            |                           |               |          |          |       |      |      |           |    |
|                                             |                    |                            |                           |               |          |          |       |      |      |           |    |
|                                             |                    |                            |                           |               |          |          |       |      |      |           |    |
|                                             |                    |                            |                           |               |          |          |       |      |      |           |    |
|                                             |                    |                            |                           |               |          |          |       |      |      |           |    |
|                                             |                    |                            |                           |               |          |          |       |      |      |           |    |
|                                             |                    |                            |                           |               |          |          |       |      |      |           |    |
|                                             |                    |                            |                           |               |          |          |       |      |      |           |    |
|                                             |                    |                            |                           |               |          |          |       |      |      |           |    |
|                                             |                    |                            |                           |               |          |          |       |      |      |           |    |
|                                             |                    |                            |                           |               |          |          |       |      |      |           |    |
|                                             |                    |                            |                           |               |          |          |       |      |      |           |    |
|                                             |                    |                            |                           |               |          |          |       |      |      |           |    |
|                                             |                    |                            |                           |               |          |          |       |      |      |           |    |
|                                             |                    |                            |                           |               |          |          |       |      |      |           |    |
|                                             |                    |                            |                           |               |          |          |       |      |      |           |    |
|                                             |                    |                            |                           |               |          |          |       |      |      |           |    |
|                                             |                    |                            |                           |               |          |          |       |      |      |           |    |
|                                             |                    |                            |                           |               |          |          |       |      |      |           |    |
|                                             |                    |                            |                           |               |          |          |       |      |      |           |    |
|                                             |                    |                            |                           |               |          |          |       |      |      |           |    |
|                                             |                    |                            |                           |               |          |          |       |      |      |           |    |
|                                             |                    |                            |                           |               |          |          |       |      |      |           |    |
|                                             |                    |                            |                           |               |          |          |       |      |      |           |    |
|                                             |                    |                            |                           |               |          |          |       |      |      |           |    |
|                                             |                    |                            |                           |               |          |          |       |      |      |           |    |
