# Supplementary material for: A Comparison of Entropic Diversity and Variance in the Study of Population Structure
Source: MDPI journal article supplement (doi:10.3390/e25030492), 2023-03-13
Supplement: s1 [file s1]

Eric F. Karlén

q = 1' based indices measure allelic differentiation, 'q = 2' based indices don't

Data Set I

Nine (9) pairs of artificial diploid populations (subsets) having ten samples per population, no allelic overlap between populations, and with equal AMD (D), equal heterozygosity, and equal variance within each population. By design,  $W_{AP}$  was 50% and the TDAP formatted indices were at the theoretical maximum for each subset.

$N_a$  = total # alleles per subset  
 $N_{a-MAX}$  = theoretical maximum  $N_a$  per subset  
 $N'_a = N_a$  expressed as a proportion of  $N_{a-MAX}$

$N_{a-MAX} = 40$

Each data set is based on one 'marker'.

Alleles for each sample are  $p_i$

|        |            | Data subsets |    |       |    |       |    |       |    |       |    |       |    |       |    |       |    |       |    |        |        |        |
|--------|------------|--------------|----|-------|----|-------|----|-------|----|-------|----|-------|----|-------|----|-------|----|-------|----|--------|--------|--------|
|        |            | SS-.9        |    | SS-.8 |    | SS-.7 |    | SS-.6 |    | SS-.5 |    | SS-.4 |    | SS-.3 |    | SS-.2 |    | SS-.1 |    | SS-.05 | Min SS | Max SS |
|        |            | 0.9          |    | 0.8   |    | 0.7   |    | 0.6   |    | 0.5   |    | 0.4   |    | 0.3   |    | 0.2   |    | 0.1   |    | 0.05   | 0.025  | 1      |
| Sample | Population | 1            | 1  | 1     | 1  | 1     | 1  | 1     | 1  | 1     | 1  | 1     | 1  | 1     | 1  | 1     | 1  | 1     | 1  | 1      | 1      | 1      |
| 1      | A          | 1            | 1  | 1     | 1  | 1     | 1  | 1     | 1  | 1     | 1  | 1     | 1  | 1     | 1  | 1     | 1  | 1     | 1  | 1      | 1      | 11     |
| 2      | A          | 1            | 12 | 1     | 1  | 1     | 1  | 1     | 1  | 1     | 1  | 1     | 1  | 1     | 1  | 1     | 1  | 1     | 1  | 1      | 1      | 12     |
| 3      | A          | 3            | 13 | 1     | 13 | 1     | 1  | 1     | 1  | 1     | 1  | 1     | 1  | 1     | 1  | 1     | 1  | 1     | 1  | 1      | 1      | 13     |
| 4      | A          | 4            | 14 | 4     | 14 | 1     | 14 | 1     | 14 | 1     | 1  | 1     | 1  | 1     | 1  | 1     | 1  | 1     | 1  | 1      | 1      | 14     |
| 5      | A          | 5            | 15 | 5     | 15 | 5     | 15 | 1     | 15 | 1     | 1  | 1     | 1  | 1     | 1  | 1     | 1  | 1     | 1  | 1      | 1      | 15     |
| 6      | A          | 6            | 16 | 6     | 16 | 6     | 16 | 6     | 16 | 1     | 16 | 1     | 1  | 1     | 1  | 1     | 1  | 1     | 1  | 1      | 1      | 16     |
| 7      | A          | 7            | 17 | 7     | 17 | 7     | 17 | 7     | 17 | 7     | 17 | 1     | 17 | 1     | 1  | 1     | 1  | 1     | 1  | 1      | 1      | 17     |
| 8      | A          | 8            | 18 | 8     | 18 | 8     | 18 | 8     | 18 | 8     | 18 | 8     | 18 | 1     | 18 | 1     | 1  | 1     | 1  | 1      | 1      | 18     |
| 9      | A          | 9            | 19 | 9     | 19 | 9     | 19 | 9     | 19 | 9     | 19 | 9     | 19 | 9     | 19 | 1     | 19 | 1     | 1  | 1      | 1      | 19     |
| 10     | A          | 10           | 20 | 10    | 20 | 10    | 20 | 10    | 20 | 10    | 20 | 10    | 20 | 10    | 20 | 10    | 20 | 1     | 20 | 1      | 20     | 20     |
| 11     | B          | 51           | 51 | 51    | 51 | 51    | 51 | 51    | 51 | 51    | 51 | 51    | 51 | 51    | 51 | 51    | 51 | 51    | 51 | 51     | 51     | 61     |
| 12     | B          | 51           | 62 | 51    | 51 | 51    | 51 | 51    | 51 | 51    | 51 | 51    | 51 | 51    | 51 | 51    | 51 | 51    | 51 | 51     | 51     | 62     |
| 13     | B          | 53           | 63 | 51    | 63 | 51    | 51 | 51    | 51 | 51    | 51 | 51    | 51 | 51    | 51 | 51    | 51 | 51    | 51 | 51     | 51     | 63     |
| 14     | B          | 54           | 64 | 54    | 64 | 51    | 64 | 51    | 64 | 51    | 51 | 51    | 51 | 51    | 51 | 51    | 51 | 51    | 51 | 51     | 51     | 64     |
| 15     | B          | 55           | 65 | 55    | 65 | 55    | 65 | 51    | 65 | 51    | 51 | 51    | 51 | 51    | 51 | 51    | 51 | 51    | 51 | 51     | 51     | 65     |
| 16     | B          | 56           | 66 | 56    | 66 | 56    | 66 | 56    | 66 | 51    | 66 | 51    | 51 | 51    | 51 | 51    | 51 | 51    | 51 | 51     | 51     | 66     |
| 17     | B          | 57           | 67 | 57    | 67 | 57    | 67 | 57    | 67 | 57    | 67 | 51    | 67 | 51    | 51 | 51    | 51 | 51    | 51 | 51     | 51     | 67     |
| 18     | B          | 58           | 68 | 58    | 68 | 58    | 68 | 58    | 68 | 58    | 68 | 58    | 68 | 51    | 68 | 51    | 51 | 51    | 51 | 51     | 51     | 68     |
| 19     | B          | 59           | 69 | 59    | 69 | 59    | 69 | 59    | 69 | 59    | 69 | 59    | 69 | 59    | 69 | 51    | 69 | 51    | 51 | 51     | 51     | 69     |
| 20     | B          | 60           | 70 | 60    | 70 | 60    | 70 | 60    | 70 | 60    | 70 | 60    | 70 | 60    | 70 | 60    | 70 | 51    | 70 | 51     | 70     | 70     |

Eric F. Karlin

q = 1' based indices measure allelic differentiation, 'q = 2' based indices don't

Data Set II

Ten (10) pairs of artificial populations (subsets) having the same parameters as the subsets in Data Set I.

with the exceptions of (1) allelic overlap occurring between the two populations in each subset and

(2) TDAP indices were not all at the theoretical maximum.

N<sub>a</sub> = total # alleles per subset

N<sub>a-MAX</sub> = theoretical maximum N<sub>a</sub> per subset

N<sub>a-MAX</sub> = 40

N'<sub>a</sub> = N<sub>a</sub> expressed as a proportion of N<sub>a-MAX</sub>

Each data set is based on one 'marker'.

Alleles for each sample are placed in columns

Data subsets

|        |            | SS-93 |    | SS-88 |    | SS-78 |    | SS-68 |    | SS-58 |    | SS-48 |    | SS-38 |    | SS-28 |    | SS-18 |    | SS-08 |  |
|--------|------------|-------|----|-------|----|-------|----|-------|----|-------|----|-------|----|-------|----|-------|----|-------|----|-------|--|
|        |            | 0.925 |    | 0.875 |    | 0.775 |    | 0.675 |    | 0.575 |    | 0.475 |    | 0.375 |    | 0.275 |    | 0.175 |    | 0.075 |  |
| Sample | Population |       |    |       |    |       |    |       |    |       |    |       |    |       |    |       |    |       |    |       |  |
| 1      | a          | 1     | 11 | 1     | 1  | 1     | 1  | 1     | 1  | 1     | 1  | 1     | 1  | 1     | 1  | 1     | 1  | 1     | 1  | 1     |  |
| 2      | a          | 2     | 12 | 1     | 12 | 1     | 1  | 1     | 1  | 1     | 1  | 1     | 1  | 1     | 1  | 1     | 1  | 1     | 1  | 1     |  |
| 3      | a          | 3     | 13 | 3     | 13 | 1     | 13 | 1     | 1  | 1     | 1  | 1     | 1  | 1     | 1  | 1     | 1  | 1     | 1  | 1     |  |
| 4      | a          | 4     | 14 | 4     | 14 | 4     | 14 | 1     | 14 | 1     | 1  | 1     | 1  | 1     | 1  | 1     | 1  | 1     | 1  | 1     |  |
| 5      | a          | 5     | 15 | 5     | 15 | 5     | 15 | 5     | 15 | 1     | 15 | 1     | 1  | 1     | 1  | 1     | 1  | 1     | 1  | 1     |  |
| 6      | a          | 6     | 16 | 6     | 16 | 6     | 16 | 6     | 16 | 6     | 16 | 1     | 16 | 1     | 1  | 1     | 1  | 1     | 1  | 1     |  |
| 7      | a          | 7     | 17 | 7     | 17 | 7     | 17 | 7     | 17 | 7     | 17 | 7     | 17 | 1     | 17 | 1     | 1  | 1     | 1  | 1     |  |
| 8      | a          | 8     | 18 | 8     | 18 | 8     | 18 | 8     | 18 | 8     | 18 | 8     | 18 | 8     | 18 | 1     | 18 | 1     | 1  | 1     |  |
| 9      | a          | 9     | 19 | 9     | 19 | 9     | 19 | 9     | 19 | 9     | 19 | 9     | 19 | 9     | 19 | 9     | 19 | 1     | 19 | 1     |  |
| 10     | a          | 10    | 20 | 10    | 20 | 10    | 20 | 10    | 20 | 10    | 20 | 10    | 20 | 10    | 20 | 10    | 20 | 10    | 20 | 1     |  |
| 11     | b          | 1     | 1  | 1     | 1  | 1     | 1  | 1     | 1  | 1     | 1  | 1     | 1  | 1     | 1  | 1     | 1  | 1     | 1  | 1     |  |
| 12     | b          | 1     | 62 | 1     | 62 | 1     | 1  | 1     | 1  | 1     | 1  | 1     | 1  | 1     | 1  | 1     | 1  | 1     | 1  | 1     |  |
| 13     | b          | 53    | 63 | 53    | 63 | 1     | 63 | 1     | 1  | 1     | 1  | 1     | 1  | 1     | 1  | 1     | 1  | 1     | 1  | 1     |  |
| 14     | b          | 54    | 64 | 54    | 64 | 54    | 64 | 1     | 64 | 1     | 1  | 1     | 1  | 1     | 1  | 1     | 1  | 1     | 1  | 1     |  |
| 15     | b          | 55    | 65 | 55    | 65 | 55    | 65 | 55    | 65 | 1     | 65 | 1     | 1  | 1     | 1  | 1     | 1  | 1     | 1  | 1     |  |
| 16     | b          | 56    | 66 | 56    | 66 | 56    | 66 | 56    | 66 | 56    | 66 | 1     | 66 | 1     | 1  | 1     | 1  | 1     | 1  | 1     |  |
| 17     | b          | 57    | 67 | 57    | 67 | 57    | 67 | 57    | 67 | 57    | 67 | 57    | 67 | 1     | 67 | 1     | 1  | 1     | 1  | 1     |  |
| 18     | b          | 58    | 68 | 58    | 68 | 58    | 68 | 58    | 68 | 58    | 68 | 58    | 68 | 58    | 68 | 1     | 68 | 1     | 1  | 1     |  |
| 19     | b          | 59    | 69 | 59    | 69 | 59    | 69 | 59    | 69 | 59    | 69 | 59    | 69 | 59    | 69 | 59    | 69 | 1     | 69 | 1     |  |
| 20     | b          | 60    | 70 | 60    | 70 | 60    | 70 | 60    | 70 | 60    | 70 | 60    | 70 | 60    | 70 | 60    | 70 | 60    | 70 | 1     |  |

| SS-05 |    | Min SS |   | Max SS |    |
|-------|----|--------|---|--------|----|
| 0.05  |    | 0.025  |   | 1      |    |
| 1     | 1  | 1      | 1 | 1      | 11 |
| 1     | 1  | 1      | 1 | 1      | 12 |
| 1     | 1  | 1      | 1 | 1      | 13 |
| 1     | 1  | 1      | 1 | 1      | 14 |
| 1     | 1  | 1      | 1 | 1      | 15 |
| 1     | 1  | 1      | 1 | 1      | 16 |
| 1     | 1  | 1      | 1 | 1      | 17 |
| 1     | 1  | 1      | 1 | 1      | 18 |
| 1     | 1  | 1      | 1 | 1      | 19 |
| 1     | 1  | 1      | 1 | 1      | 20 |
| 51    | 51 | 1      | 1 | 51     | 61 |
| 51    | 51 | 1      | 1 | 52     | 62 |
| 51    | 51 | 1      | 1 | 53     | 63 |
| 51    | 51 | 1      | 1 | 54     | 64 |
| 51    | 51 | 1      | 1 | 55     | 65 |
| 51    | 51 | 1      | 1 | 56     | 66 |
| 51    | 51 | 1      | 1 | 57     | 67 |
| 51    | 51 | 1      | 1 | 58     | 68 |
| 51    | 51 | 1      | 1 | 59     | 69 |
| 51    | 51 | 1      | 1 | 60     | 70 |

Eric F. Karlén       $q = 1'$  based indices measure allelic differentiation, ' $q = 2'$  based indices don't

**Data Set III**

Ten (10) pairs of artificial populations (subsets) were created based on the same parameters used for the subsets in DS-II except that heterozygosity, variance, and  $\Delta$  are not balanced between the two populations in each subset.

$N_s$  = total # alleles per subset  
 $N_{s\text{-}MAX}$  = theoretical maximum  $N_s$  per subset  
 $N'_s = N_s$  expressed as a proportion of  $N_{s\text{-}MAX}$

Each data set is based on one 'marker'.  
Alleles for each sample are placed in columns

|    |   | Data subsets |    |      |    |      |    |      |    |      |    |      |    |      |    |      |    |      |    |       |    | 0.025  |    |        |    |
|----|---|--------------|----|------|----|------|----|------|----|------|----|------|----|------|----|------|----|------|----|-------|----|--------|----|--------|----|
|    |   | SS-9         |    | SS-8 |    | SS-7 |    | SS-6 |    | SS-5 |    | SS-4 |    | SS-3 |    | SS-2 |    | SS-1 |    | SS-05 |    | Min SS |    | Max SS |    |
|    |   | 0.9          |    | 0.8  |    | 0.7  |    | 0.6  |    | 0.5  |    | 0.4  |    | 0.3  |    | 0.2  |    | 0.1  |    | 0.05  |    | 0.025  |    | 1.0    |    |
|    |   | $N'_s$       |    |      |    |      |    |      |    |      |    |      |    |      |    |      |    |      |    |       |    |        |    |        |    |
| 1  | a | 1            | 1  | 1    | 1  | 1    | 1  | 1    | 1  | 1    | 1  | 1    | 1  | 1    | 1  | 1    | 1  | 1    | 1  | 1     | 1  | 1      | 1  | 1      | 1  |
| 2  | a | 1            | 12 | 1    | 1  | 1    | 1  | 1    | 1  | 1    | 1  | 1    | 1  | 1    | 1  | 1    | 1  | 1    | 1  | 1     | 1  | 1      | 1  | 1      | 1  |
| 3  | a | 3            | 13 | 1    | 1  | 1    | 1  | 1    | 1  | 1    | 1  | 1    | 1  | 1    | 1  | 1    | 1  | 1    | 1  | 1     | 1  | 1      | 1  | 1      | 1  |
| 4  | a | 4            | 14 | 1    | 14 | 1    | 1  | 1    | 1  | 1    | 1  | 1    | 1  | 1    | 1  | 1    | 1  | 1    | 1  | 1     | 1  | 1      | 1  | 1      | 1  |
| 5  | a | 5            | 15 | 5    | 15 | 1    | 1  | 1    | 1  | 1    | 1  | 1    | 1  | 1    | 1  | 1    | 1  | 1    | 1  | 1     | 1  | 1      | 1  | 1      | 1  |
| 6  | a | 6            | 16 | 6    | 16 | 1    | 16 | 1    | 1  | 1    | 1  | 1    | 1  | 1    | 1  | 1    | 1  | 1    | 1  | 1     | 1  | 1      | 1  | 1      | 1  |
| 7  | a | 7            | 17 | 7    | 17 | 7    | 17 | 1    | 1  | 1    | 1  | 1    | 1  | 1    | 1  | 1    | 1  | 1    | 1  | 1     | 1  | 1      | 1  | 1      | 1  |
| 8  | a | 8            | 18 | 8    | 18 | 8    | 18 | 1    | 18 | 1    | 1  | 1    | 1  | 1    | 1  | 1    | 1  | 1    | 1  | 1     | 1  | 1      | 1  | 1      | 1  |
| 9  | a | 9            | 19 | 9    | 19 | 9    | 19 | 9    | 19 | 1    | 1  | 1    | 1  | 1    | 1  | 1    | 1  | 1    | 1  | 1     | 1  | 1      | 1  | 1      | 1  |
| 10 | a | 10           | 20 | 10   | 20 | 10   | 20 | 10   | 20 | 1    | 20 | 1    | 1  | 1    | 1  | 1    | 1  | 1    | 1  | 1     | 1  | 1      | 1  | 1      | 1  |
| 11 | b | 1            | 1  | 1    | 1  | 1    | 1  | 1    | 1  | 1    | 1  | 1    | 1  | 1    | 1  | 1    | 1  | 1    | 1  | 1     | 1  | 1      | 1  | 1      | 1  |
| 12 | b | 52           | 62 | 52   | 62 | 52   | 62 | 52   | 62 | 63   | 62 | 1    | 1  | 1    | 1  | 1    | 1  | 1    | 1  | 1     | 1  | 1      | 1  | 1      | 1  |
| 13 | b | 53           | 63 | 53   | 63 | 53   | 63 | 53   | 63 | 53   | 63 | 1    | 63 | 1    | 1  | 1    | 1  | 1    | 1  | 1     | 1  | 1      | 1  | 1      | 1  |
| 14 | b | 54           | 64 | 54   | 64 | 54   | 64 | 54   | 64 | 54   | 64 | 54   | 64 | 1    | 1  | 1    | 1  | 1    | 1  | 1     | 1  | 1      | 1  | 1      | 1  |
| 15 | b | 55           | 65 | 55   | 65 | 55   | 65 | 55   | 65 | 55   | 65 | 55   | 65 | 1    | 65 | 1    | 1  | 1    | 1  | 1     | 1  | 1      | 1  | 1      | 1  |
| 16 | b | 56           | 66 | 56   | 66 | 56   | 66 | 56   | 66 | 56   | 66 | 56   | 66 | 56   | 66 | 1    | 1  | 1    | 1  | 1     | 1  | 1      | 1  | 1      | 1  |
| 17 | b | 57           | 67 | 57   | 67 | 57   | 67 | 57   | 67 | 57   | 67 | 57   | 67 | 57   | 67 | 1    | 67 | 1    | 1  | 1     | 1  | 1      | 1  | 1      | 1  |
| 18 | b | 58           | 68 | 58   | 68 | 58   | 68 | 58   | 68 | 58   | 68 | 58   | 68 | 58   | 68 | 58   | 68 | 1    | 1  | 1     | 1  | 1      | 1  | 1      | 1  |
| 19 | b | 59           | 69 | 59   | 69 | 59   | 69 | 59   | 69 | 59   | 69 | 59   | 69 | 59   | 69 | 59   | 69 | 1    | 1  | 1     | 1  | 1      | 1  | 1      | 1  |
| 20 | b | 60           | 70 | 60   | 70 | 60   | 70 | 60   | 70 | 60   | 70 | 60   | 70 | 60   | 70 | 60   | 70 | 60   | 70 | 1     | 70 | 1      | 70 | 1      | 70 |
