# Supplementary material for: A Comparison of Entropic Diversity and Variance in the Study of Population Structure
Source: MDPI journal article supplement (doi:10.3390/e25030492), 2023-03-13
Supplement: s1 [file s1]

Data adapted from: Karlin, E.F., Boles, S.B.; Shaw, A.J. Resolving boundaries between species in Sphagnum section Subsecunda using microsatellite markers. Taxon 2008 57, 1189-1200. doi.org/10.1002/tax.574012

Haploid data

Three data sets for regional populations of haploid gametophytes of *Sphagnum comosum* Müll. Hal. and *S. novo-zelandicum* Mitt. (14 samples each).

| Sample  | Taxon                     | STAB SSRs |     |     |     |     |     |     |     |     | <SSR | MOD SSRs |     |     | HYPE SSRs |     |     |
|---------|---------------------------|-----------|-----|-----|-----|-----|-----|-----|-----|-----|------|----------|-----|-----|-----------|-----|-----|
|         |                           | 22        | 17  | 1   | 5   | 19  | 18  | 16  | 29  | 28  |      | 9        | 4   | 12  | 20        | 10  | 14  |
| EK4     | <i>S. comosum</i>         | 102       | 158 | 254 | 192 | 252 | 141 | 254 | 190 | 240 | 180  | 164      | 186 | 123 | 297       | 225 | 239 |
| EK55    | <i>S. comosum</i>         | 102       | 158 | 249 | 192 | 252 | 141 | 254 | 190 | 240 | 180  |          | 186 | 123 | 297       | 225 | 237 |
| EK56    | <i>S. comosum</i>         | 102       | 158 | 249 | 192 | 252 | 141 | 254 | 190 | 240 | 180  |          | 184 | 123 | 294       | 225 | 237 |
| EK8     | <i>S. comosum</i>         | 108       | 158 | 254 | 192 | 252 | 138 | 254 | 190 | 238 | 180  |          | 186 | 123 | 291       | 229 | 245 |
| EK27    | <i>S. comosum</i>         | 108       | 158 | 249 | 192 | 252 | 141 | 254 | 190 | 240 | 180  |          | 184 | 123 | 297       | 233 | 219 |
| EK229a  | <i>S. comosum</i>         | 112       | 158 | 255 | 192 | 252 | 138 | 254 | 190 | 240 | 180  |          | 184 | 123 | 291       | 243 | 237 |
| SB1832  | <i>S. comosum</i>         | 108       | 158 | 254 | 192 | 252 | 138 | 254 | 190 | 238 | 180  |          | 184 | 123 | 297       | 239 | 219 |
| SB1833  | <i>S. comosum</i>         | 102       | 158 | 249 | 192 | 252 | 138 | 254 | 190 | 238 | 182  |          | 184 | 123 | 294       | 225 | 239 |
| SB127   | <i>S. comosum</i>         | 102       | 158 | 254 | 192 | 252 | 138 | 254 | 190 | 240 | 180  |          | 184 | 123 | 297       | 241 | 219 |
| SB1132  | <i>S. comosum</i>         | 102       | 158 | 254 | 192 | 252 | 138 | 254 | 190 | 240 | 180  |          | 184 | 123 | 297       | 241 | 219 |
| EK326   | <i>S. comosum</i>         | 102       | 158 | 254 | 193 | 252 | 141 | 254 | 190 | 240 | 180  |          | 186 | 123 | 297       | 241 | 219 |
| EK325   | <i>S. comosum</i>         | 102       | 161 | 268 | 192 | 252 | 138 | 254 | 190 | 242 | 180  |          | 186 | 123 | 297       | 223 | 233 |
| EK324   | <i>S. comosum</i>         | 102       | 158 | 254 | 192 | 252 | 138 | 254 | 190 | 240 | 180  |          | 186 | 123 | 297       | 227 | 241 |
| EK322f  | <i>S. comosum</i>         | 102       | 158 | 249 | 192 | 252 | 138 | 254 | 190 | 238 | 180  |          | 184 | 123 | 294       | 243 | 239 |
| SB881   | <i>S. novo-zelandicum</i> | 108       | 158 | 254 | 192 | 252 | 138 | 254 | 202 | 238 | 180  |          | 197 | 130 | 288       | 233 | 235 |
| EK3     | <i>S. novo-zelandicum</i> | 105       | 164 | 254 | 194 | 252 | 138 | 254 | 202 | 238 | 180  | 195      | 132 | 288 | 237       | 229 |     |
| EK60    | <i>S. novo-zelandicum</i> | 108       | 164 | 254 | 194 | 252 | 132 | 254 | 202 | 238 | 180  | 195      | 132 | 291 | 231       | 229 |     |
| EK59    | <i>S. novo-zelandicum</i> | 108       | 158 | 254 | 194 | 252 | 132 | 254 | 202 | 238 | 180  | 175      | 132 | 288 | 241       | 221 |     |
| EK62    | <i>S. novo-zelandicum</i> | 108       | 158 | 254 | 194 | 252 | 132 | 254 | 202 | 238 | 180  | 191      | 128 | 288 | 247       | 219 |     |
| EK14    | <i>S. novo-zelandicum</i> | 108       | 161 | 255 | 194 | 252 | 141 | 254 | 202 | 238 | 180  | 184      | 132 | 288 | 237       | 211 |     |
| EK34    | <i>S. novo-zelandicum</i> | 108       | 161 | 255 | 194 | 252 | 141 | 254 | 202 | 238 | 180  | 195      | 132 | 288 | 237       | 211 |     |
| EK15    | <i>S. novo-zelandicum</i> | 108       | 161 | 255 | 194 | 252 | 141 | 254 | 202 | 238 | 180  | 195      | 124 | 288 | 239       | 211 |     |
| EK327n  | <i>S. novo-zelandicum</i> | 102       | 167 | 254 | 194 | 252 | 138 | 254 | 202 | 238 | 180  | 193      | 135 | 288 | 235       | 227 |     |
| EK224ci | <i>S. novo-zelandicum</i> | 108       | 158 | 254 | 194 | 252 | 138 | 254 | 202 | 238 | 180  | 195      | 128 | 282 | 239       | 223 |     |
| EK227a  | <i>S. novo-zelandicum</i> | 108       | 164 | 254 | 194 | 252 | 138 | 254 | 202 | 238 | 180  | 195      | 132 | 288 | 243       | 225 |     |
| EK228a  | <i>S. novo-zelandicum</i> | 108       | 164 | 254 | 194 | 252 | 138 | 254 | 202 | 238 | 180  | 184      | 128 | 288 | 241       | 231 |     |
| EK230a  | <i>S. novo-zelandicum</i> | 108       | 164 | 254 | 194 | 252 | 138 | 254 | 202 | 238 | 180  | 195      | 132 | 288 | 239       | 219 |     |
| SB1136a | <i>S. novo-zelandicum</i> | 108       | 158 | 254 | 192 | 252 | 138 | 254 | 202 | 238 | 180  | 195      | 128 | 285 | 245       | 217 |     |

Data adapted from: Karlin, E.F., Boles, S.B.; Shaw, A.J. Resolving boundaries between species in *Sphagnum* section *Subsecunda* using microsatellite markers.  
*Taxon* 2008 57, 1189-1200.

**Diploid data**

Three data sets for two 'artificial' diploid sporophyte populations of *Sphagnum novo-zelandicum* Mitt. (6 diploid samples per population)  
 Alleles for each SSR are placed in rows (not in columns)

| Haplotype<br>Sample | Genotype↓ | SSR> | STAB SSRs |     |     | MOD SSRs |     |     |     | HYPE SSRs |     |
|---------------------|-----------|------|-----------|-----|-----|----------|-----|-----|-----|-----------|-----|
|                     |           |      | 22        | 20  | 1   | 18       | 4   | 12  | 17  | 10        | 14  |
| SB881               | a         |      | 108       | 288 | 254 | 138      | 197 | 130 | 158 | 233       | 235 |
| EK3                 | a         |      | 105       | 288 | 254 | 138      | 195 | 132 | 164 | 237       | 229 |
| EK60                | b         |      | 108       | 291 | 254 | 132      | 195 | 132 | 164 | 231       | 229 |
| EK59                | b         |      | 108       | 288 | 254 | 132      | 175 | 132 | 158 | 241       | 221 |
| EK62                | c         |      | 108       | 288 | 254 | 132      | 191 | 128 | 158 | 247       | 219 |
| EK14                | c         |      | 108       | 288 | 255 | 141      | 184 | 132 | 161 | 237       | 211 |
| EK327n              | d         |      | 102       | 288 | 254 | 138      | 193 | 135 | 167 | 235       | 227 |
| EK224ci             | d         |      | 108       | 282 | 254 | 138      | 195 | 128 | 158 | 239       | 223 |
| EK227a              | e         |      | 108       | 288 | 254 | 138      | 195 | 132 | 164 | 243       | 225 |
| EK228a              | e         |      | 108       | 288 | 254 | 138      | 184 | 128 | 164 | 241       | 231 |
| EK230a              | f         |      | 108       | 288 | 254 | 138      | 195 | 132 | 164 | 239       | 219 |
| SB1136a             | f         |      | 108       | 285 | 254 | 138      | 195 | 128 | 158 | 245       | 217 |
| EK526               | g         |      | 108       | 288 | 254 | 138      | 197 | 130 | 158 | 233       | 231 |
| EK13                | g         |      | 108       | 288 | 255 | 141      | 195 | 132 | 161 | 239       | 211 |
| SB881               | h         |      | 108       | 288 | 254 | 138      | 197 | 130 | 158 | 233       | 235 |
| EK59                | h         |      | 108       | 288 | 254 | 132      | 175 | 132 | 158 | 241       | 221 |
| EK34                | i         |      | 108       | 288 | 255 | 141      | 195 | 132 | 161 | 237       | 211 |
| EK34                | i         |      | 108       | 288 | 255 | 141      | 195 | 132 | 161 | 237       | 211 |
| EK34                | j         |      | 108       | 288 | 255 | 141      | 195 | 132 | 161 | 237       | 211 |
| EK34                | j         |      | 108       | 288 | 255 | 141      | 195 | 132 | 161 | 237       | 211 |
| EK15                | k         |      | 108       | 288 | 255 | 141      | 195 | 124 | 161 | 239       | 211 |
| EK15                | k         |      | 108       | 288 | 255 | 141      | 195 | 124 | 161 | 239       | 211 |
| EK15                | m         |      | 108       | 288 | 255 | 141      | 195 | 124 | 161 | 239       | 211 |
| EK15                | m         |      | 108       | 288 | 255 | 141      | 195 | 124 | 161 | 239       | 211 |

Data adapted from: Karlín, E.F., Boles, S.B.; Shaw, A.J. Systematics of *Sphagnum* section *Sphagnum* in New Zealand: a microsatellite-based analysis. *New Zealand Journal of Botany* 2008, 46, 105–118.  
Karlín, E.F.; Hotchkiss, S.C.; *et al.* High genetic diversity in a remote island population system: sams sex. *New Phytologist* **2012** *193*, 1088–1097.

**Allodiploid data**

Three SSR data sets for regional population of two gametophytically allodiploid *Sphagnum* species (31 samples per population)  
Alleles for each SSR are placed in rows (not in columns)

| Taxon               | Sample↓ | STAB SSRs |     |     |     |     |     |     |     |     | MOD SSRs |     |     | HYPE SSRs |     |     |
|---------------------|---------|-----------|-----|-----|-----|-----|-----|-----|-----|-----|----------|-----|-----|-----------|-----|-----|
|                     |         | 22        | 30  | 18  | 5   | 19  | 29  | 1   | 9   | 20  | <SSR     | 7   | 28  | 4         | 10  | 14  |
| <i>S. palustre</i>  | 42      | 102       | 143 | 132 | 192 | 260 | 192 | 246 | 179 | 292 |          | 169 | 233 | 199       | 233 | 249 |
| <i>S. palustre</i>  | 42      | 106       | 143 | 135 | 198 | 260 | 196 | 254 | 179 | 292 |          | 175 | 236 | 199       | 248 | 249 |
| <i>S. palustre</i>  | 34      | 102       | 143 | 132 | 192 | 260 | 192 | 246 | 179 | 292 |          | 169 | 233 | 199       | 235 | 239 |
| <i>S. palustre</i>  | 34      | 106       | 143 | 135 | 198 | 260 | 196 | 254 | 179 | 292 |          | 179 | 233 | 199       | 248 | 239 |
| <i>S. palustre</i>  | 37      | 102       | 143 | 132 | 192 | 260 | 192 | 246 | 179 | 292 |          | 169 | 233 | 199       | 239 | 208 |
| <i>S. palustre</i>  | 37      | 106       | 143 | 135 | 198 | 260 | 196 | 254 | 179 | 292 |          | 175 | 236 | 199       | 244 | 229 |
| <i>S. palustre</i>  | 24      | 102       | 143 | 132 | 192 | 260 | 192 | 246 | 179 | 292 |          | 169 | 233 | 199       | 239 | 223 |
| <i>S. palustre</i>  | 24      | 106       | 143 | 135 | 198 | 260 | 196 | 246 | 179 | 292 |          | 175 | 236 | 199       | 246 | 223 |
| <i>S. palustre</i>  | 36      | 102       | 143 | 132 | 192 | 260 | 192 | 246 | 179 | 292 |          | 169 | 233 | 199       | 239 | 223 |
| <i>S. palustre</i>  | 36      | 106       | 143 | 135 | 198 | 260 | 196 | 254 | 179 | 292 |          | 175 | 236 | 199       | 246 | 223 |
| <i>S. palustre</i>  | 38      | 102       | 143 | 132 | 192 | 260 | 192 | 246 | 179 | 292 |          | 169 | 233 | 199       | 239 | 223 |
| <i>S. palustre</i>  | 38      | 106       | 143 | 135 | 198 | 260 | 196 | 254 | 179 | 292 |          | 175 | 236 | 199       | 246 | 223 |
| <i>S. palustre</i>  | 39      | 102       | 143 | 132 | 192 | 260 | 192 | 246 | 179 | 292 |          | 169 | 233 | 199       | 243 | 231 |
| <i>S. palustre</i>  | 39      | 106       | 143 | 135 | 198 | 260 | 196 | 254 | 179 | 292 |          | 175 | 236 | 199       | 248 | 231 |
| <i>S. palustre</i>  | 41      | 102       | 143 | 132 | 192 | 260 | 192 | 246 | 179 | 292 |          | 169 | 233 | 199       | 239 | 223 |
| <i>S. palustre</i>  | 41      | 106       | 143 | 135 | 198 | 260 | 196 | 254 | 179 | 292 |          | 175 | 236 | 199       | 246 | 223 |
| <i>S. palustre</i>  | 94      | 102       | 143 | 132 | 192 | 260 | 192 | 246 | 179 | 292 |          | 169 | 233 | 199       | 239 | 223 |
| <i>S. palustre</i>  | 94      | 106       | 143 | 135 | 198 | 260 | 196 | 254 | 179 | 292 |          | 175 | 236 | 199       | 246 | 223 |
| <i>S. palustre</i>  | 25      | 102       | 143 | 132 | 192 | 260 | 192 | 246 | 179 | 292 |          | 169 | 233 | 199       | 241 | 223 |
| <i>S. palustre</i>  | 25      | 106       | 143 | 135 | 198 | 260 | 196 | 254 | 179 | 292 |          | 175 | 236 | 199       | 246 | 223 |
| <i>S. palustre</i>  | 17      | 102       | 143 | 132 | 192 | 260 | 192 | 246 | 179 | 292 |          | 169 | 233 | 199       | 243 | 253 |
| <i>S. palustre</i>  | 17      | 106       | 143 | 135 | 198 | 260 | 196 | 254 | 179 | 292 |          | 175 | 236 | 199       | 248 | 253 |
| <i>S. palustre</i>  | 95      | 102       | 143 | 132 | 192 | 260 | 192 | 246 | 181 | 292 |          | 169 | 233 | 199       | 233 | 225 |
| <i>S. palustre</i>  | 95      | 106       | 143 | 135 | 200 | 260 | 196 | 254 | 181 | 292 |          | 175 | 236 | 199       | 246 | 225 |
| <i>S. palustre</i>  | 2       | 102       | 143 | 132 | 192 | 260 | 192 | 246 | 181 | 292 |          | 169 | 233 | 200       | 223 | 229 |
| <i>S. palustre</i>  | 2       | 106       | 143 | 135 | 200 | 260 | 196 | 254 | 181 | 292 |          | 175 | 236 | 200       | 246 | 229 |
| <i>S. palustre</i>  | 92      | 102       | 143 | 132 | 192 | 260 | 192 | 246 | 179 | 284 |          | 169 | 233 | 199       | 243 | 257 |
| <i>S. palustre</i>  | 92      | 106       | 143 | 135 | 198 | 260 | 196 | 254 | 179 | 284 |          | 175 | 236 | 199       | 246 | 257 |
| <i>S. palustre</i>  | 18      | 102       | 143 | 135 | 192 | 260 | 192 | 246 | 181 | 292 |          | 169 | 233 | 199       | 221 | 233 |
| <i>S. palustre</i>  | 18      | 106       | 143 | 138 | 200 | 260 | 196 | 254 | 181 | 292 |          | 175 | 236 | 199       | 248 | 233 |
| <i>S. palustre</i>  | 20      | 102       | 143 | 135 | 192 | 260 | 192 | 246 | 181 | 292 |          | 169 | 233 | 199       | 223 | 251 |
| <i>S. palustre</i>  | 20      | 106       | 143 | 138 | 200 | 260 | 196 | 254 | 181 | 292 |          | 175 | 236 | 199       | 246 | 251 |
| <i>S. palustre</i>  | 21      | 102       | 143 | 135 | 192 | 260 | 192 | 246 | 181 | 292 |          | 169 | 233 | 199       | 223 | 249 |
| <i>S. palustre</i>  | 21      | 106       | 143 | 138 | 200 | 260 | 196 | 254 | 181 | 292 |          | 175 | 236 | 199       | 246 | 249 |
| <i>S. palustre</i>  | 22      | 102       | 143 | 135 | 192 | 260 | 192 | 246 | 181 | 292 |          | 169 | 233 | 199       | 221 | 239 |
| <i>S. palustre</i>  | 22      | 106       | 143 | 138 | 200 | 260 | 196 | 254 | 181 | 292 |          | 175 | 236 | 199       | 246 | 239 |
| <i>S. palustre</i>  | 56      | 102       | 143 | 132 | 192 | 260 | 192 | 246 | 179 | 284 |          | 169 | 233 | 199       | 241 | 257 |
| <i>S. palustre</i>  | 56      | 106       | 143 | 135 | 198 | 260 | 196 | 254 | 179 | 284 |          | 175 | 236 | 199       | 246 | 257 |
| <i>S. palustre</i>  | 57      | 102       | 143 | 132 | 192 | 260 | 192 | 246 | 179 | 284 |          | 169 | 233 | 199       | 241 | 259 |
| <i>S. palustre</i>  | 57      | 106       | 143 | 135 | 198 | 260 | 196 | 254 | 179 | 284 |          | 175 | 236 | 199       | 246 | 259 |
| <i>S. palustre</i>  | 58      | 102       | 143 | 132 | 192 | 260 | 192 | 246 | 179 | 284 |          | 169 | 233 | 199       | 241 | 257 |
| <i>S. palustre</i>  | 58      | 106       | 143 | 135 | 198 | 260 | 196 | 254 | 179 | 284 |          | 175 | 236 | 199       | 246 | 257 |
| <i>S. palustre</i>  | 59      | 102       | 143 | 132 | 192 | 260 | 192 | 246 | 179 | 284 |          | 169 | 233 | 200       | 241 | 257 |
| <i>S. palustre</i>  | 59      | 106       | 143 | 135 | 198 | 260 | 196 | 254 | 179 | 284 |          | 175 | 236 | 200       | 246 | 257 |
| <i>S. palustre</i>  | 60      | 102       | 143 | 132 | 192 | 260 | 192 | 246 | 179 | 284 |          | 169 | 233 | 199       | 241 | 257 |
| <i>S. palustre</i>  | 60      | 106       | 143 | 135 | 198 | 260 | 196 | 254 | 179 | 284 |          | 175 | 236 | 199       | 246 | 257 |
| <i>S. palustre</i>  | 61      | 102       | 143 | 132 | 192 | 260 | 192 | 246 | 179 | 292 |          | 169 | 233 | 199       | 239 | 245 |
| <i>S. palustre</i>  | 61      | 106       | 143 | 135 | 198 | 260 | 196 | 254 | 179 | 292 |          | 175 | 236 | 199       | 248 | 245 |
| <i>S. palustre</i>  | 62      | 102       | 143 | 132 | 192 | 260 | 192 | 246 | 179 | 292 |          | 169 | 233 | 199       | 239 | 245 |
| <i>S. palustre</i>  | 62      | 106       | 143 | 135 | 198 | 260 | 196 | 254 | 179 | 292 |          | 175 | 236 | 199       | 248 | 245 |
| <i>S. palustre</i>  | 63      | 102       | 143 | 132 | 192 | 260 | 192 | 246 | 179 | 292 |          | 169 | 233 | 200       | 239 | 245 |
| <i>S. palustre</i>  | 63      | 106       | 143 | 135 | 198 | 260 | 196 | 254 | 179 | 292 |          | 175 | 236 | 200       | 248 | 245 |
| <i>S. palustre</i>  | 64      | 102       | 143 | 132 | 192 | 260 | 192 | 246 | 179 | 284 |          | 169 | 233 | 199       | 241 | 257 |
| <i>S. palustre</i>  | 64      | 106       | 143 | 135 | 198 | 260 | 196 | 254 | 179 | 284 |          | 175 | 236 | 199       | 246 | 257 |
| <i>S. palustre</i>  | 65      | 102       | 143 | 132 | 192 | 260 | 192 | 246 | 179 | 292 |          | 169 | 233 | 200       | 239 | 245 |
| <i>S. palustre</i>  | 65      | 106       | 143 | 135 | 198 | 260 | 196 | 254 | 179 | 292 |          | 175 | 236 | 200       | 248 | 245 |
| <i>S. palustre</i>  | 66      | 102       | 143 | 132 | 192 | 260 | 192 | 246 | 179 | 284 |          | 169 | 233 | 199       | 241 | 257 |
| <i>S. palustre</i>  | 66      | 106       | 143 | 135 | 198 | 260 | 196 | 254 | 179 | 284 |          | 175 | 236 | 199       | 246 | 257 |
| <i>S. palustre</i>  | 67      | 102       | 143 | 132 | 192 | 260 | 192 | 246 | 179 | 292 |          | 169 | 233 | 199       | 239 | 245 |
| <i>S. palustre</i>  | 67      | 106       | 143 | 135 | 198 | 260 | 196 | 254 | 179 | 292 |          | 175 | 236 | 199       | 248 | 245 |
| <i>S. palustre</i>  | 68      | 102       | 143 | 132 | 192 | 260 | 192 | 246 | 179 | 284 |          | 169 | 233 | 199       | 241 | 257 |
| <i>S. palustre</i>  | 68      | 106       | 143 | 135 | 198 | 260 | 196 | 254 | 179 | 284 |          | 175 | 236 | 199       | 246 | 257 |
| <i>S. cristatum</i> | 82      | 86        | 143 | 132 | 196 | 263 | 192 | 246 | 179 | 292 |          | 170 | 234 | 187       | 231 | 257 |
| <i>S. cristatum</i> | 82      | 102       | 139 | 135 | 198 | 263 | 196 | 253 | 179 | 292 |          | 176 | 238 | 187       | 244 | 257 |
| <i>S. cristatum</i> | 83      | 86        | 143 | 132 | 196 | 263 | 196 | 246 | 179 | 292 |          | 170 | 234 | 187       | 231 | 262 |
| <i>S. cristatum</i> | 83      | 102       | 139 | 135 | 198 | 263 | 196 | 253 | 179 | 292 |          | 176 | 238 | 187       | 244 | 262 |
| <i>S. cristatum</i> | 84      | 86        | 143 | 132 | 196 | 263 | 196 | 246 | 179 | 292 |          | 170 | 234 | 187       | 251 | 237 |
| <i>S. cristatum</i> | 84      | 102       | 153 | 135 | 190 | 263 | 196 | 253 | 179 | 292 |          | 176 | 238 | 187       | 244 | 237 |
| <i>S. cristatum</i> | 85      | 86        | 143 | 132 | 196 | 263 | 192 | 246 | 179 | 292 |          | 170 | 234 | 187       | 231 | 262 |
| <i>S. cristatum</i> | 85      | 102       | 139 | 135 | 198 | 263 | 196 | 253 | 179 | 292 |          | 176 | 238 | 187       | 244 | 262 |
| <i>S. cristatum</i> | 86      | 86        | 146 | 132 | 196 | 263 | 196 | 246 | 179 | 295 |          | 170 | 234 | 187       | 244 | 229 |
| <i>S. cristatum</i> | 86      | 102       | 153 | 135 | 198 | 263 | 196 | 253 | 179 | 295 |          | 176 | 238 | 187       | 244 | 229 |
| <i>S. cristatum</i> | 87      | 86        | 143 | 132 | 196 | 263 | 196 | 246 | 179 | 295 |          | 170 | 234 | 187       | 229 | 241 |
| <i>S. cristatum</i> | 87      | 102       | 153 | 135 | 200 | 263 | 196 | 253 | 179 | 295 |          | 176 | 238 | 187       | 244 | 241 |
| <i>S. cristatum</i> | 88      | 86        | 143 | 132 | 196 | 263 | 192 | 246 | 179 | 292 |          | 170 | 234 | 187       | 233 | 251 |
| <i>S. cristatum</i> | 88      | 102       | 153 | 135 | 198 | 263 | 196 | 253 | 179 | 292 |          | 176 | 238 | 187       | 244 | 251 |
| <i>S. cristatum</i> | 90      | 86        | 143 | 132 | 196 | 263 | 192 | 246 | 179 | 292 |          | 170 | 234 | 187       | 221 | 245 |
| <i>S. cristatum</i> | 90      | 102       | 156 | 135 | 198 | 263 | 196 | 253 | 179 | 292 |          | 176 | 238 | 187       | 244 | 245 |
| <i>S. cristatum</i> | 91      | 86        | 143 | 132 | 196 | 263 | 192 | 246 | 179 | 292 |          | 170 | 234 | 187       | 221 | 247 |
| <i>S. cristatum</i> | 91      | 102       | 136 | 135 | 200 | 263 | 196 | 25  |     |     |          |     |     |           |     |     |

Eric F. Karlin A comparison of diversity and variance in the study of genetic structure of populations

Data adapted from: Karlin, E.F.; Smouse, P.E. Holantarctic diversity varies widely among genetic loci within the gametophytically allotriploid peat moss *Sphagnum xfalcatulum*. *American Journal of Botany* 2019, 106, 137–144.

Allotriploid data

Three SSR data sets for two population of the gametophytically allotriploid *Sphagnum xfalcatulum* Besch. (21 samples per population)  
Alleles for each SSR are placed in three rows (not in columns)

| Population   | Sample↓ | STAB SSRs |     |     |     |     |     |     |     |     |  | <SSR | MOD SSRs |     |     | HYPE SSRs |     |
|--------------|---------|-----------|-----|-----|-----|-----|-----|-----|-----|-----|--|------|----------|-----|-----|-----------|-----|
|              |         | 22        | 1   | 19  | 7   | 4   | 17  | 12  | 18  | 30  |  |      | 9        | 5   | 20  | 10        | 14  |
| Population A | 199     | 83        | 259 | 263 | 191 | 186 | 164 | 116 | 132 | 140 |  |      | 187      | 194 | 287 | 245       | 229 |
| Population A | 199     | 89        | 255 | 257 | 177 | 178 | 164 | 116 | 132 | 143 |  |      | 187      | 209 | 293 | 253       | 268 |
| Population A | 199     | 112       | 254 | 252 | 179 | 186 | 161 | 121 | 135 | 143 |  |      | 176      | 492 | 302 | 308       | 229 |
| Population A | 205     | 83        | 259 | 263 | 191 | 186 | 164 | 116 | 132 | 140 |  |      | 187      | 194 | 287 | 255       | 227 |
| Population A | 205     | 89        | 250 | 257 | 177 | 178 | 164 | 116 | 132 | 143 |  |      | 187      | 206 | 290 | 255       | 277 |
| Population A | 205     | 112       | 254 | 252 | 179 | 184 | 161 | 123 | 145 | 143 |  |      | 198      | 486 | 298 | 364       | 227 |
| Population A | 149     | 83        | 259 | 263 | 191 | 182 | 164 | 116 | 132 | 140 |  |      | 187      | 194 | 287 | 231       | 257 |
| Population A | 149     | 89        | 250 | 257 | 183 | 178 | 164 | 116 | 132 | 143 |  |      | 192      | 206 | 284 | 275       | 251 |
| Population A | 149     | 112       | 254 | 252 | 179 | 184 | 161 | 121 | 145 | 143 |  |      | 194      | 486 | 296 | 294       | 269 |
| Population A | EK266   | 83        | 259 | 263 | 191 | 186 | 164 | 116 | 132 | 140 |  |      | 187      | 194 | 287 | 217       | 243 |
| Population A | EK266   | 89        | 250 | 257 | 181 | 178 | 164 | 116 | 132 | 143 |  |      | 187      | 204 | 290 | 273       | 243 |
| Population A | EK266   | 112       | 254 | 252 | 179 | 186 | 161 | 121 | 145 | 143 |  |      | 194      | 483 | 302 | 321       | 243 |
| Population A | 141     | 83        | 259 | 263 | 191 | 186 | 164 | 116 | 132 | 140 |  |      | 187      | 200 | 287 | 253       | 235 |
| Population A | 141     | 89        | 250 | 257 | 179 | 178 | 164 | 116 | 132 | 143 |  |      | 180      | 206 | 290 | 253       | 268 |
| Population A | 141     | 112       | 254 | 252 | 179 | 186 | 161 | 121 | 145 | 143 |  |      | 190      | 487 | 298 | 341       | 235 |
| Population A | EK330   | 83        | 259 | 263 | 191 | 186 | 164 | 116 | 132 | 140 |  |      | 187      | 200 | 287 | 253       | 227 |
| Population A | EK330   | 89        | 250 | 257 | 179 | 178 | 164 | 116 | 132 | 143 |  |      | 180      | 206 | 290 | 257       | 260 |
| Population A | EK330   | 112       | 254 | 252 | 179 | 186 | 161 | 121 | 145 | 143 |  |      | 190      | 487 | 298 | 337       | 227 |
| Population A | 203     | 83        | 259 | 263 | 193 | 186 | 164 | 116 | 132 | 140 |  |      | 187      | 194 | 287 | 245       | 247 |
| Population A | 203     | 89        | 250 | 257 | 181 | 178 | 164 | 116 | 132 | 143 |  |      | 187      | 206 | 290 | 257       | 286 |
| Population A | 203     | 112       | 254 | 252 | 179 | 186 | 161 | 121 | 145 | 143 |  |      | 209      | 486 | 296 | 345       | 247 |
| Population A | 144     | 83        | 259 | 263 | 191 | 186 | 164 | 116 | 132 | 140 |  |      | 187      | 194 | 287 | 237       | 233 |
| Population A | 144     | 89        | 250 | 257 | 177 | 178 | 164 | 116 | 132 | 143 |  |      | 187      | 209 | 290 | 253       | 257 |
| Population A | 144     | 112       | 254 | 252 | 179 | 186 | 161 | 121 | 145 | 143 |  |      | 200      | 492 | 298 | 368       | 233 |
| Population A | 200     | 83        | 259 | 263 | 193 | 186 | 164 | 116 | 132 | 140 |  |      | 187      | 194 | 287 | 245       | 249 |
| Population A | 200     | 89        | 250 | 257 | 181 | 178 | 164 | 116 | 132 | 143 |  |      | 187      | 206 | 290 | 257       | 288 |
| Population A | 200     | 112       | 254 | 252 | 179 | 186 | 161 | 121 | 145 | 143 |  |      | 217      | 486 | 296 | 343       | 249 |
| Population A | 21      | 83        | 259 | 263 | 191 | 186 | 164 | 116 | 132 | 140 |  |      | 187      | 194 | 287 | 251       | 233 |
| Population A | 21      | 89        | 250 | 257 | 183 | 178 | 164 | 116 | 132 | 143 |  |      | 191      | 206 | 284 | 266       | 257 |
| Population A | 21      | 112       | 254 | 252 | 179 | 186 | 161 | 121 | 145 | 143 |  |      | 195      | 486 | 296 | 308       | 281 |
| Population A | 107     | 83        | 259 | 263 | 191 | 186 | 164 | 116 | 132 | 140 |  |      | 187      | 194 | 287 | 253       | 251 |
| Population A | 107     | 89        | 255 | 257 | 181 | 178 | 164 | 116 | 132 | 143 |  |      | 209      | 196 | 281 | 266       | 257 |
| Population A | 107     | 112       | 254 | 252 | 179 | 182 | 161 | 121 | 135 | 143 |  |      | 217      | 475 | 298 | 321       | 251 |
| Population A | 57      | 83        | 259 | 263 | 191 | 186 | 164 | 116 | 132 | 140 |  |      | 187      | 194 | 287 | 253       | 251 |
| Population A | 57      | 89        | 255 | 257 | 181 | 178 | 164 | 116 | 132 | 143 |  |      | 209      | 196 | 281 | 266       | 257 |
| Population A | 57      | 112       | 254 | 252 | 179 | 186 | 161 | 121 | 135 | 143 |  |      | 217      | 475 | 298 | 321       | 251 |
| Population A | 111     | 83        | 259 | 263 | 191 | 186 | 164 | 116 | 132 | 140 |  |      | 187      | 194 | 287 | 279       | 262 |
| Population A | 111     | 89        | 250 | 257 | 181 | 178 | 167 | 116 | 132 | 143 |  |      | 192      | 206 | 298 | 290       | 268 |
| Population A | 111     | 115       | 254 | 252 | 179 | 186 | 161 | 121 | 145 | 143 |  |      | 194      | 489 | 298 | 368       | 262 |
| Population A | 110     | 83        | 259 | 263 | 191 | 186 | 164 | 116 | 132 | 140 |  |      | 187      | 194 | 287 | 279       | 262 |
| Population A | 110     | 89        | 250 | 257 | 181 | 178 | 167 | 116 | 132 | 143 |  |      | 192      | 206 | 298 | 292       | 270 |
| Population A | 110     | 115       | 254 | 252 | 179 | 190 | 161 | 121 | 145 | 143 |  |      | 194      | 489 | 298 | 368       | 262 |
| Population A | 112     | 83        | 259 | 263 | 191 | 186 | 164 | 116 | 132 | 140 |  |      | 187      | 194 | 287 | 281       | 264 |
| Population A | 112     | 89        | 250 | 257 | 181 | 178 | 167 | 116 | 132 | 143 |  |      | 192      | 206 | 298 | 290       | 268 |
| Population A | 112     | 115       | 254 | 252 | 179 | 190 | 161 | 121 | 145 | 143 |  |      | 194      | 489 | 298 | 368       | 264 |
| Population A | 118     | 83        | 259 | 263 | 191 | 186 | 164 | 116 | 132 | 140 |  |      | 187      | 194 | 287 | 272       | 260 |
| Population A | 118     | 89        | 250 | 257 | 181 | 178 | 167 | 116 | 132 | 143 |  |      | 192      | 206 | 298 | 272       | 255 |
| Population A | 118     | 115       | 254 | 252 | 179 | 190 | 161 | 121 | 145 | 143 |  |      | 194      | 489 | 298 | 272       | 260 |
| Population A | 120     | 83        | 259 | 263 | 191 | 186 | 164 | 116 | 132 | 140 |  |      | 187      | 194 | 287 | 272       | 260 |
| Population A | 120     | 89        | 250 | 257 | 181 | 178 | 167 | 116 | 132 | 143 |  |      | 192      | 206 | 298 | 272       | 255 |
| Population A | 120     | 115       | 254 | 252 | 179 | 190 | 161 | 121 | 145 | 143 |  |      | 194      | 489 | 298 | 272       | 249 |
| Population A | 32abf   | 83        | 259 | 263 | 191 | 186 | 164 | 116 | 132 | 140 |  |      | 187      | 194 | 287 | 241       | 253 |
| Population A | 32abf   | 89        | 250 | 257 | 181 | 178 | 164 | 116 | 132 | 143 |  |      | 180      | 211 | 293 | 266       | 273 |
| Population A | 32abf   | 115       | 254 | 252 | 179 | 182 | 161 | 121 | 135 | 143 |  |      | 205      | 492 | 298 | 364       | 253 |
| Population A | 119f    | 83        | 259 | 263 | 195 | 186 | 164 | 116 | 132 | 140 |  |      | 187      | 200 | 287 | 253       | 225 |
| Population A | 119f    | 89        | 255 | 257 | 183 | 178 | 164 | 116 | 132 | 143 |  |      | 180      | 206 | 293 | 253       | 255 |
| Population A | 119f    | 112       | 254 | 252 | 179 | 188 | 161 | 121 | 135 | 143 |  |      | 209      | 487 | 298 | 323       | 260 |
| Population A | 201f    | 83        | 259 | 263 | 191 | 186 | 164 | 116 | 132 | 140 |  |      | 187      | 200 | 287 | 253       | 225 |
| Population A | 201f    | 89        | 255 | 257 | 183 | 178 | 164 | 116 | 132 | 143 |  |      | 180      | 206 | 293 | 253       | 255 |
| Population A | 201f    | 112       | 254 | 252 | 179 | 186 | 161 | 121 | 135 | 143 |  |      | 209      | 487 | 298 | 323       | 260 |
| Population A | EK910*  | 83        | 259 | 263 | 191 | 186 | 164 | 116 | 132 | 140 |  |      | 187      | 194 | 287 | 239       | 233 |
| Population A | EK910*  | 89        | 250 | 257 | 177 | 178 | 164 | 116 | 132 | 143 |  |      | 180      | 204 | 296 | 253       | 257 |
| Population A | EK910*  | 112       | 254 | 252 | 179 | 184 | 161 | 123 | 145 | 143 |  |      | 190      | 483 | 298 | 255       | 233 |
| Population B | 702     | 83        | 259 | 263 | 191 | 186 | 161 | 116 | 132 | 140 |  |      | 187      | 194 | 287 | 247       | 227 |
| Population B | 702     | 89        | 250 | 257 | 177 | 178 | 164 | 116 | 132 | 143 |  |      | 176      | 204 | 296 | 257       | 247 |
| Population B | 702     | 105       | 254 | 252 | 179 | 186 | 164 | 123 | 145 | 143 |  |      | 180      | 484 | 308 | 345       | 282 |
| Population B | 703     | 83        | 259 | 263 | 191 | 186 | 161 | 116 | 132 | 140 |  |      | 187      | 194 | 287 | 247       | 227 |
| Population B | 703     | 89        | 250 | 257 | 177 | 178 | 164 | 116 | 132 | 143 |  |      | 176      | 204 | 296 | 257       | 247 |
| Population B | 703     | 105       | 254 | 252 | 179 | 186 | 164 | 123 | 145 | 143 |  |      | 180      | 484 | 308 | 345       | 288 |
| Population B | 705     | 83        | 259 | 263 | 191 | 186 | 161 | 116 | 132 | 140 |  |      | 187      | 194 | 287 | 249       | 227 |
| Population B | 705     | 89        | 250 | 257 | 177 | 178 | 164 | 116 | 132 | 143 |  |      | 176      | 204 | 296 | 257       | 247 |
| Population B | 705     | 105       | 254 | 252 | 179 | 186 | 164 | 123 | 145 | 143 |  |      | 180      | 484 | 308 | 347       | 288 |
| Population B | 707     | 83        | 259 | 263 | 191 | 186 | 161 | 116 | 132 | 140 |  |      | 187      | 194 | 287 | 247       | 227 |
| Population B | 707     | 89        | 250 | 257 | 177 | 178 | 164 | 116 | 132 | 143 |  |      | 176      | 204 | 296 | 257       | 247 |
| Population B | 707     | 105       | 254 | 252 | 179 | 186 | 164 | 123 | 145 | 143 |  |      | 180      | 484 | 308 | 345       | 290 |
| Population B | 708     | 83        | 259 | 263 | 191 | 186 | 161 | 116 | 132 | 140 |  |      | 187      | 200 | 287 | 255       | 245 |
| Population B | 708     | 89        | 250 | 257 | 183 | 178 | 164 | 116 | 132 | 143 |  |      | 200      | 206 | 284 | 257       | 256 |
| Population B | 708     | 112       | 254 | 252 | 179 | 182 | 164 | 121 | 145 | 143 |  |      | 200      | 488 | 305 | 331       | 271 |
| Population B | 709     | 83        | 259 | 263 | 191 | 186 | 161 | 116 | 132 | 140 |  |      | 187      | 200 | 287 | 255       | 245 |
